# Supplementary material for: Designing highly multiplex PCR primer sets with Simulated Annealing Design using Dimer Likelihood Estimation (SADDLE)
Source: PubMed Central journal article supplement (PMC9001684; doi:10.1038/s41467-022-29500-4), 2022-04-11
Supplement: 41467_2022_29500_MOESM4_ESM.pdf [file 41467_2022_29500_MOESM4_ESM.pdf]

**Title:** Supplementary Data 1.

**Description:** Primer sequences for all experiments.

**Title:** Supplementary Data 2.

**Description:** Badness of all primer pairs of PS1, PS2 and PS3.

**Title:** Supplementary Data 3.

**Description:** Number of dimer reads of all primer pairs of PS1, PS2 and PS3.
